# Supplementary material for: Effects of temperature, pH and counterions on the stability of peptide amphiphile nanofiber structures
Source: Royal Society of Chemistry journal article supplement (doi:10.1039/c6ra21261a), 2016-01-01
Supplement: c6ra21261a1.pdf [file c6ra21261a1.pdf]

# Supplementary Material

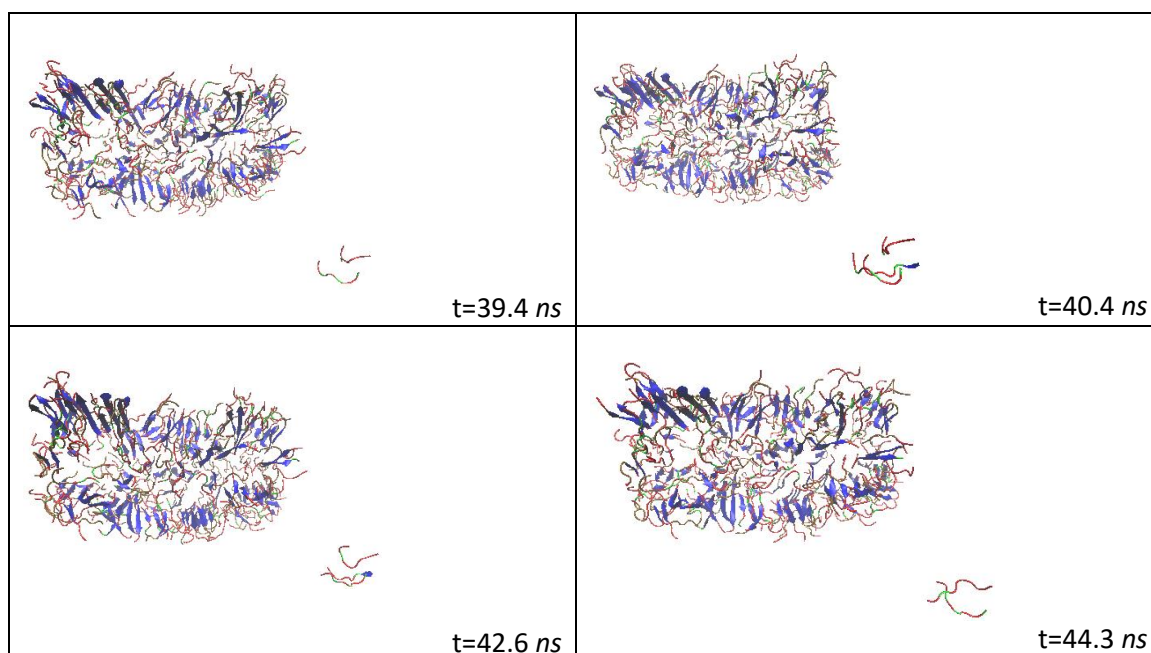

**Figure SI-1.** Representative snapshots of PA3 nanofiber at 310 K. While a minor increase in fiber diameter was present, no fiber disintegration was observed.

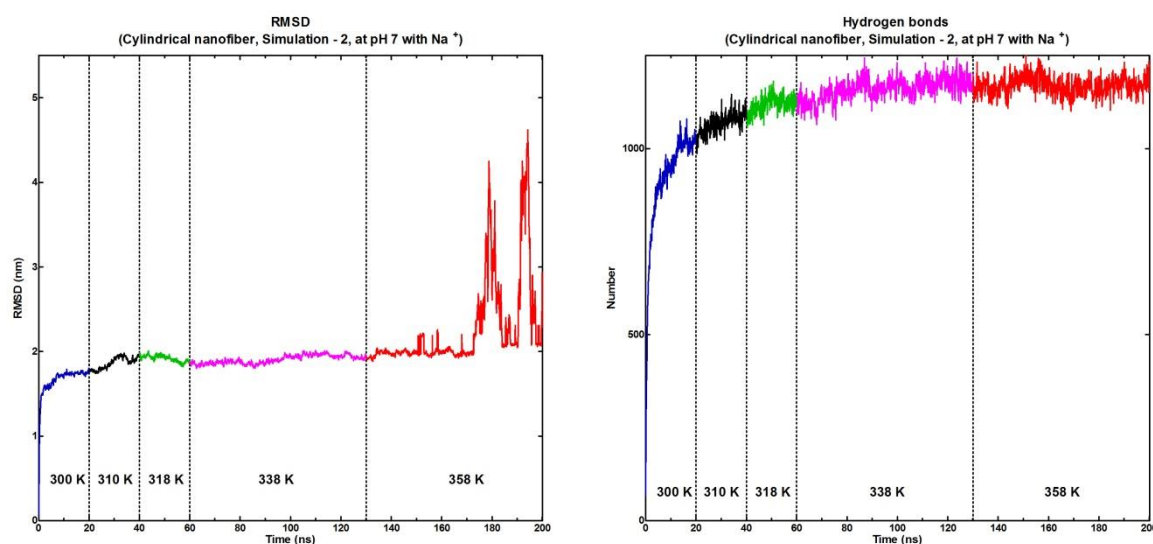

**Figure SI-2.** Extended simulation for the RMSD values and number of H-bonds associated with the gradual heating of the PA1 nanofiber (Simulation 1).

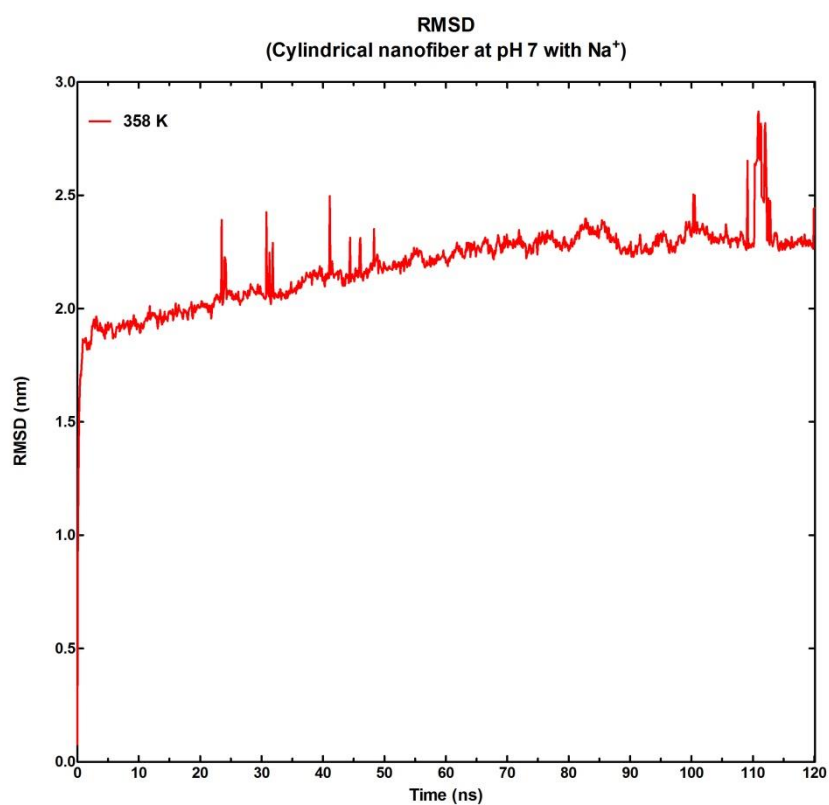

**Figure SI-3.** Extended simulation for the RMSD values associated with the PA1 nanofiber heated to 358 K.

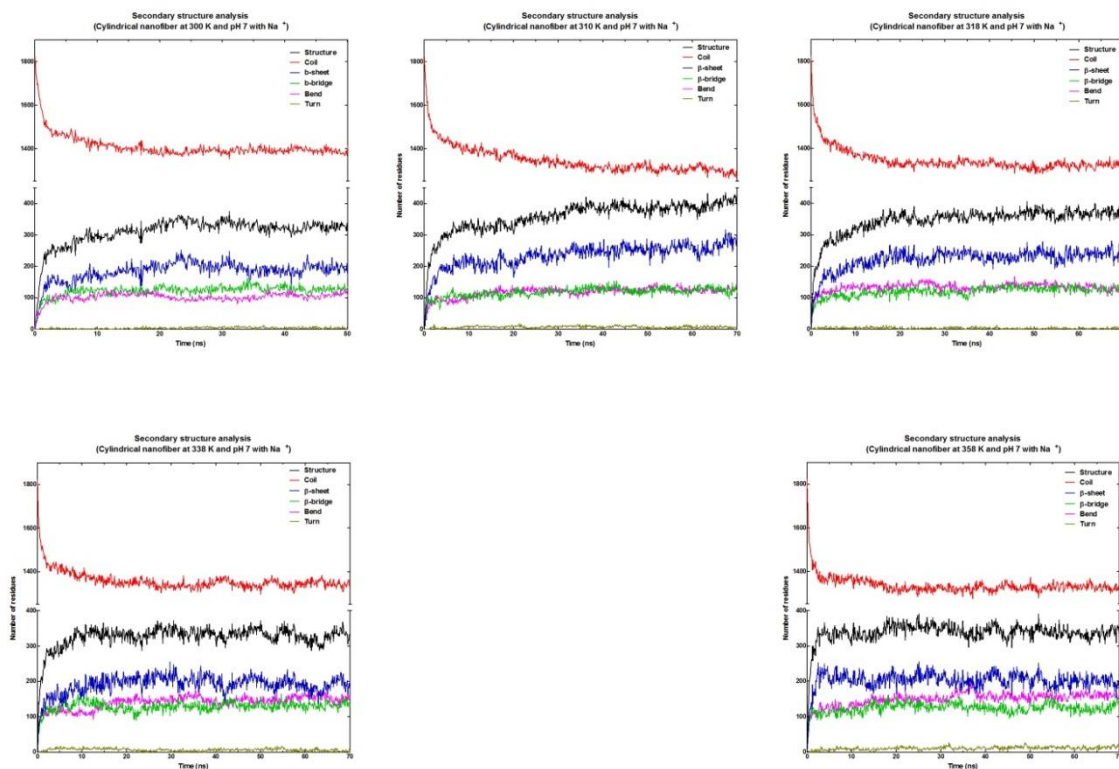

**Figure SI-4.** DSSP of PA1 nanofiber at different temperature values.

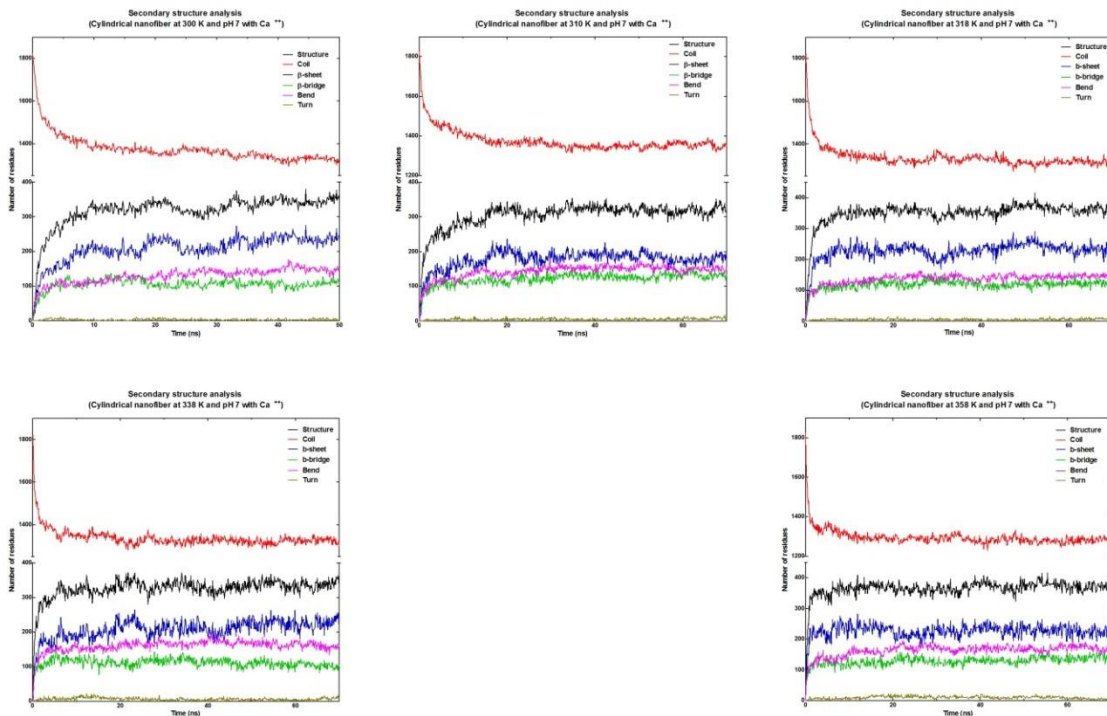

**Figure SI-5.** DSSP of PA2 nanofiber at different temperature values.

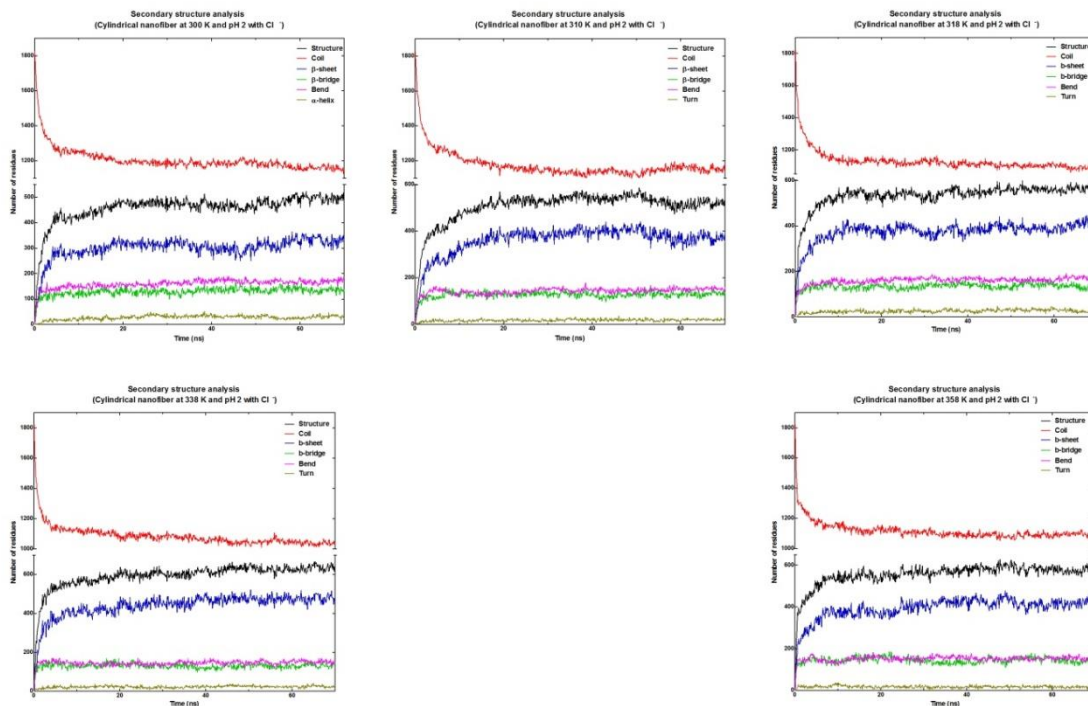

**Figure SI-6.** DSSP of PA3 nanofiber at different temperature values.

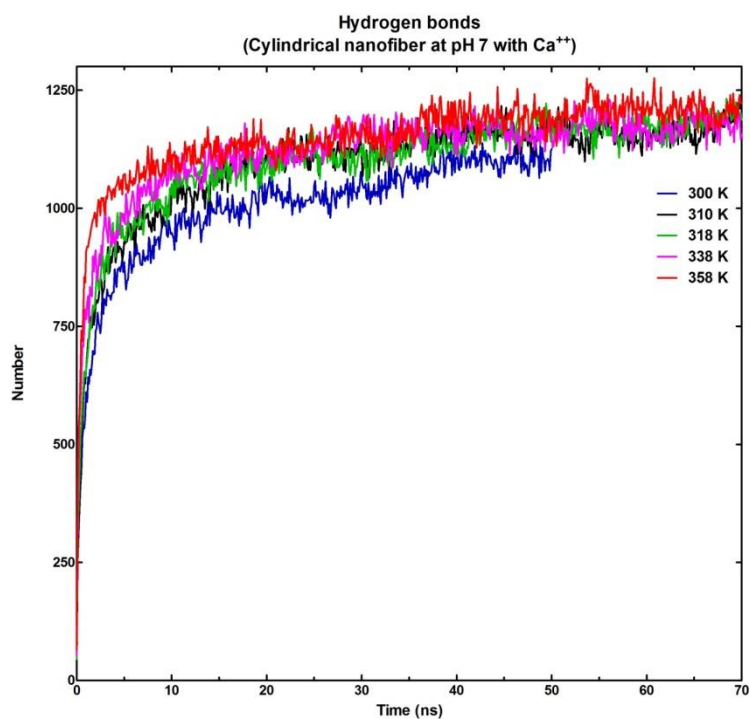

**Figure SI-7.** Number of H-bonds formed between the PA2 molecules as a function of simulation time.

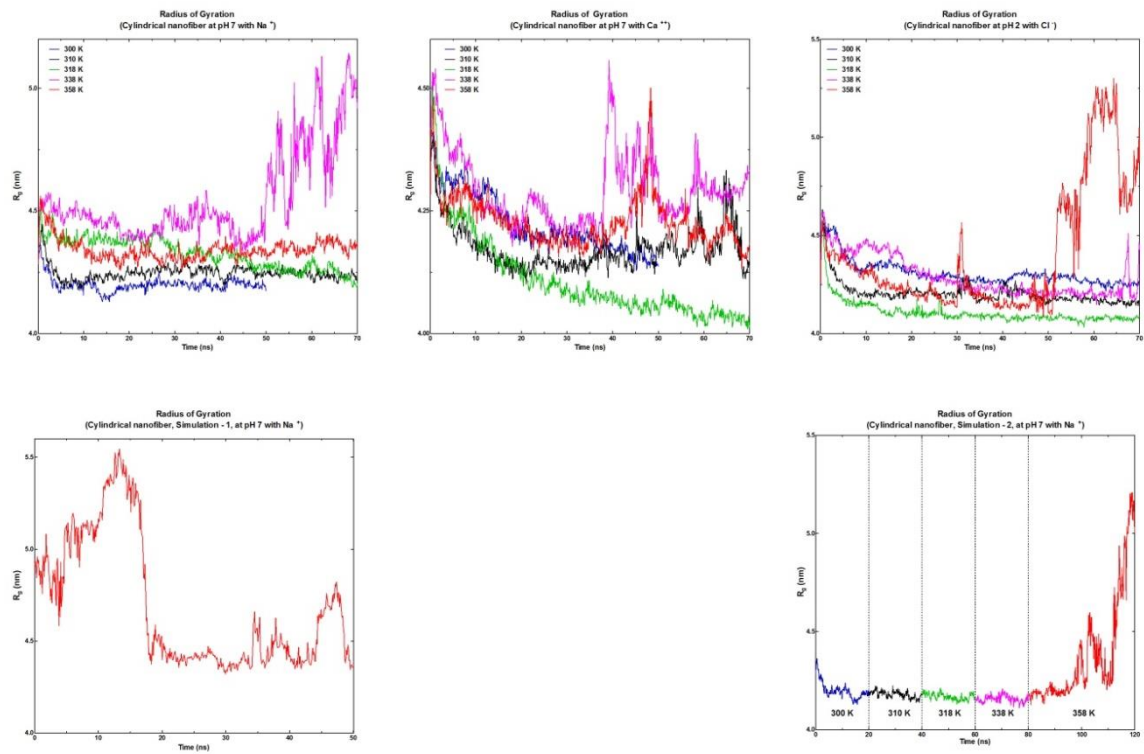

**Figure SI-8.** Plots of the radius of gyration for all nanofibers over the simulation time.
